# Supplementary material for: Selective oxidation of methane to methanol and methyl hydroperoxide over palladium modified MoO3 photocatalyst under ambient conditions
Source: Royal Society of Chemistry journal article supplement (doi:10.1039/d2cy00240j), 2022-01-01
Supplement: d2cy00240j1.pdf [file d2cy00240j1.pdf]

Supporting Information for

**Selective oxidation of methane to methanol and methyl hydroperoxide over  
palladium modified MoO<sub>3</sub> photocatalyst under ambient conditions**

Songmei Sun,<sup>a,b,c\*</sup> Nicholas F. Dummer,<sup>a\*</sup> Takudzwa Bere,<sup>a</sup> Alexandra J. Barnes,<sup>a</sup>  
Greg Shaw,<sup>a</sup> Mark Douthwaite,<sup>a</sup> Samuel Pattisson,<sup>a</sup> Richard Lewis,<sup>a</sup> Nia Richards,<sup>a</sup>  
David J. Morgan,<sup>a</sup> Graham J. Hutchings<sup>a\*</sup>

<sup>a</sup>Max Planck- Cardiff Centre on the Fundamentals of Heterogeneous Catalysis  
FUNCAT, Cardiff Catalysis Institute, School of Chemistry, Cardiff University, Main  
Building, Park Place, Cardiff, CF10 3AT, UK

<sup>b</sup>Donghua University, College of Environmental Science and Engineering, Shanghai  
201620, P.R. China

<sup>c</sup>Shanghai Institute of Pollution Control and Ecological Security, Shanghai 200092,  
P.R. China

\* Correspondence: [sunsm@dhu.edu.cn](mailto:sunsm@dhu.edu.cn), [dummernf@cardiff.ac.uk](mailto:dummernf@cardiff.ac.uk),  
[hutch@cardiff.ac.uk](mailto:hutch@cardiff.ac.uk)

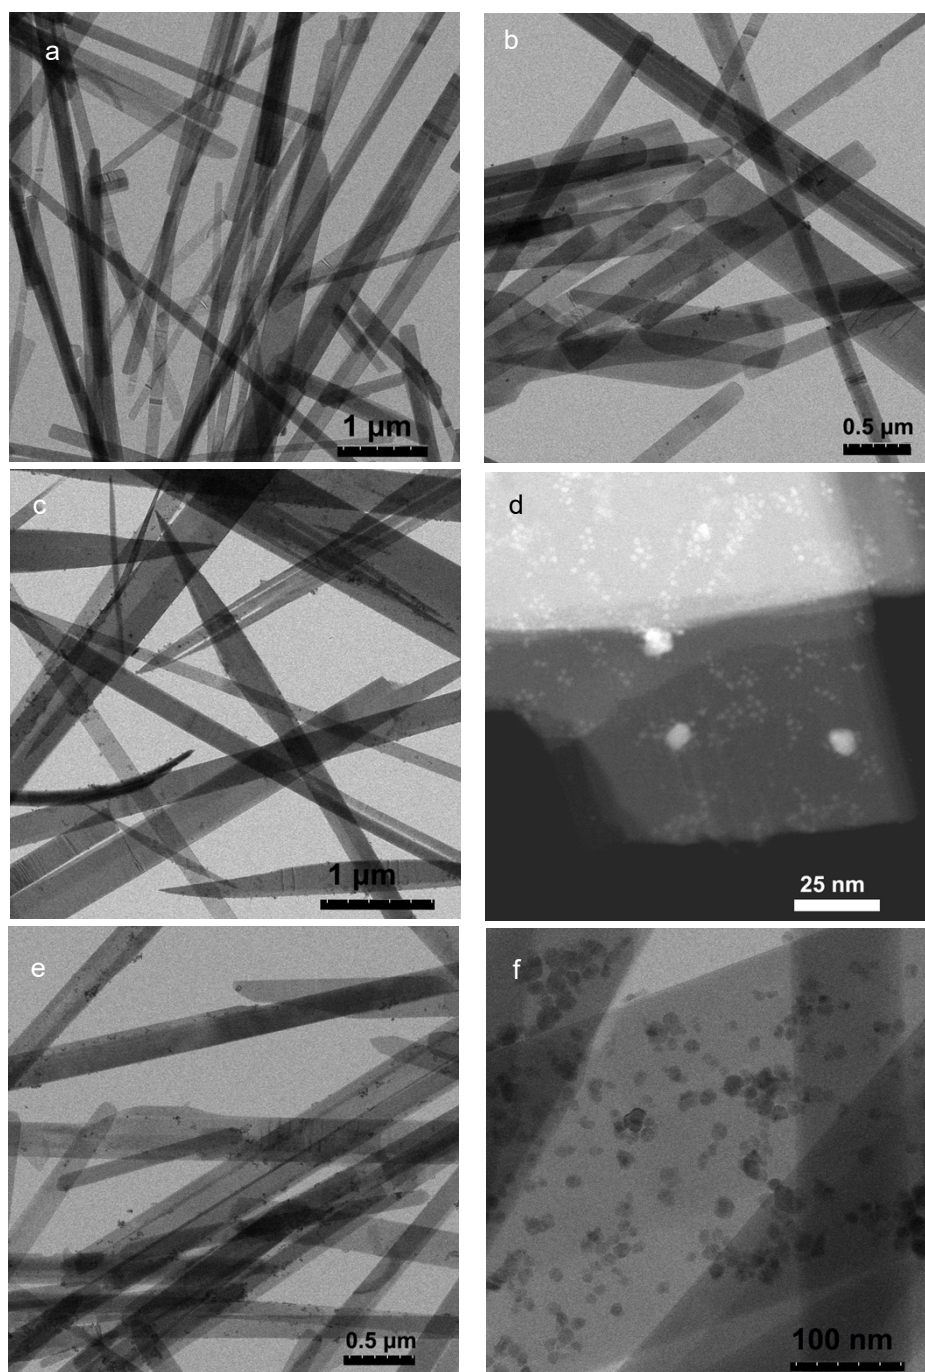

Figure S1 (a) Low magnified TEM image of MoO<sub>3</sub> sample, (b) Low magnified TEM image of 0.92 wt.% Pd/MoO<sub>3</sub> sample, (c) Low magnified TEM image of 1.86 wt.% Pd/MoO<sub>3</sub> sample, (d) High magnified STEM image of 1.86 wt.% Pd/MoO<sub>3</sub> sample, (e) Low magnified TEM image of 3.75 wt.% Pd/MoO<sub>3</sub> sample, (f) High magnified TEM image of 3.75 wt.% Pd/MoO<sub>3</sub> sample.

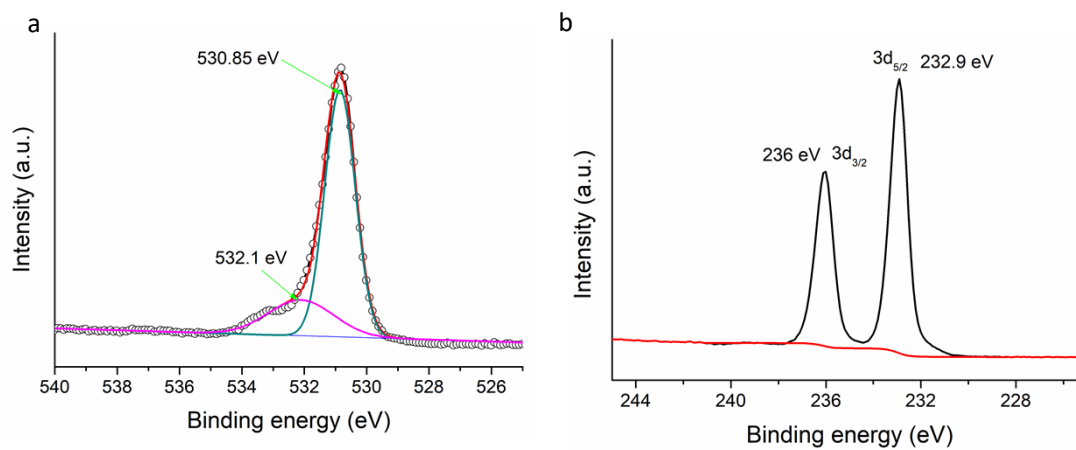

Figure S2 (a) O 1s XPS spectrum of 1.86 wt.% Pd/MoO<sub>3</sub> sample. (b) Mo 3d XPS spectrum of 1.86 wt.% Pd/MoO<sub>3</sub> sample. The peak at 530.8 eV in Figure S2a is ascribed to the lattice oxygen, while the other peak located at 532.1 eV is attributed to OH groups on the surface and possibly some signal from the support tape.

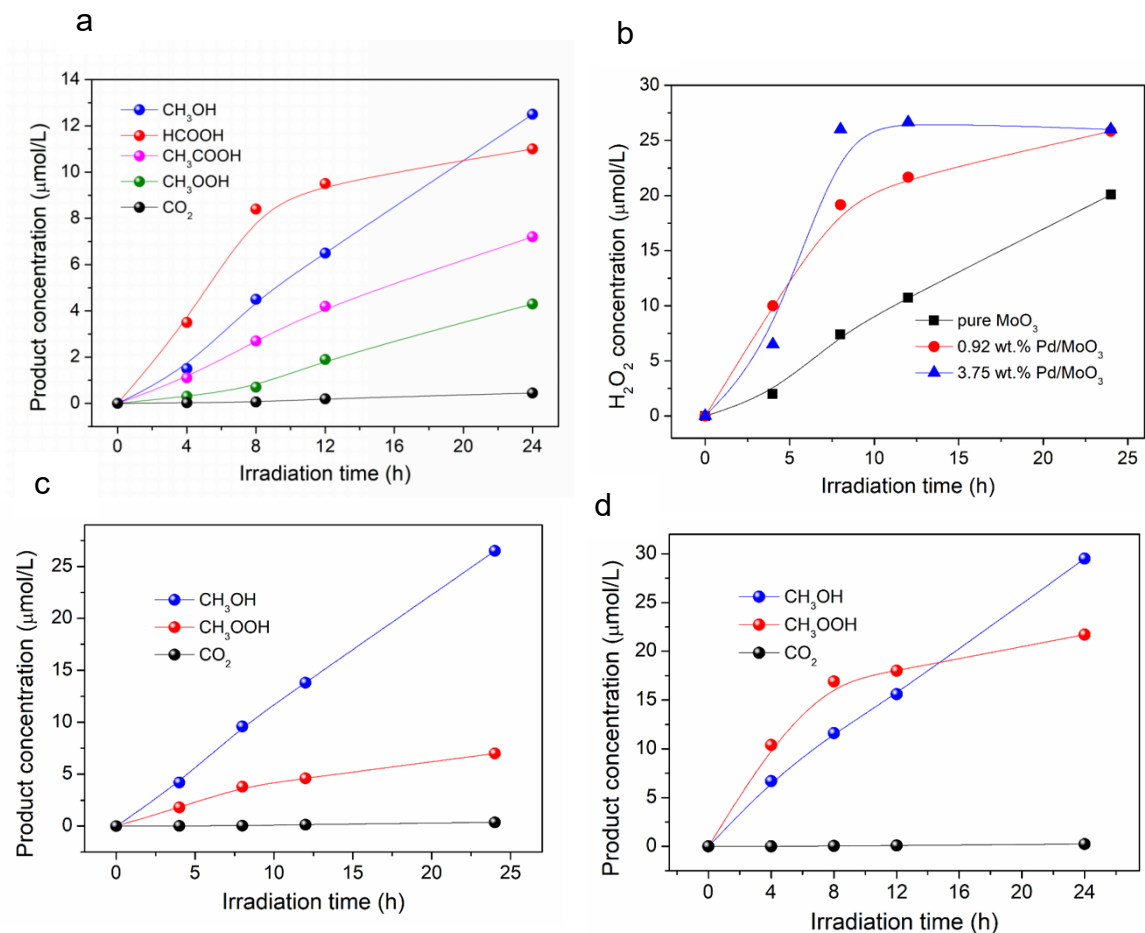

Figure S3 Photocatalytic methane conversion and H<sub>2</sub>O<sub>2</sub> production performance as a function of irradiation time. (a) Methane oxidation product yields over the pure MoO<sub>3</sub> sample. (b) H<sub>2</sub>O<sub>2</sub> yield over pure MoO<sub>3</sub>, 0.92 wt.% Pd/MoO<sub>3</sub> and 3.75 wt.% Pd/MoO<sub>3</sub>. (c) Methane oxidation products yields over 0.92 wt.% Pd/MoO<sub>3</sub>. (d) Methane oxidation product yields over 3.75 wt.% Pd/MoO<sub>3</sub>

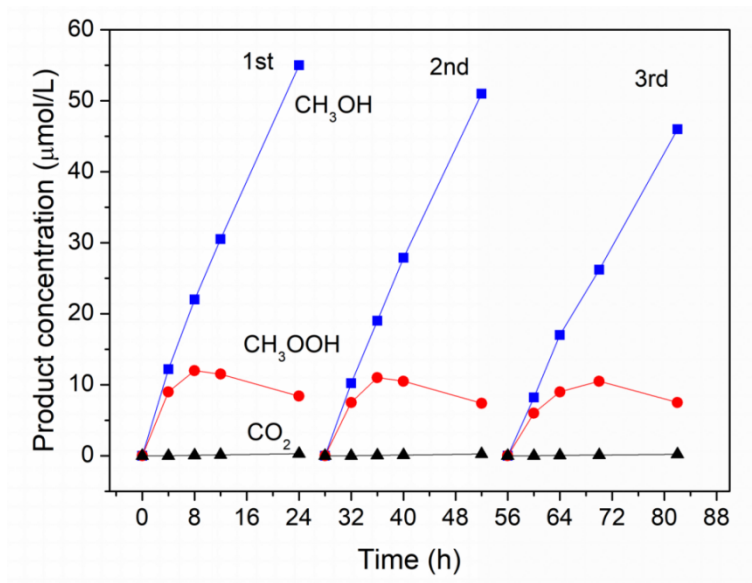

Figure S4 Three catalytic reuse cycles of CH<sub>4</sub> oxidation over 1.86 wt.% Pd/MoO<sub>3</sub> under simulated solar light irradiation illustrating the product concentration as a function of total reaction time

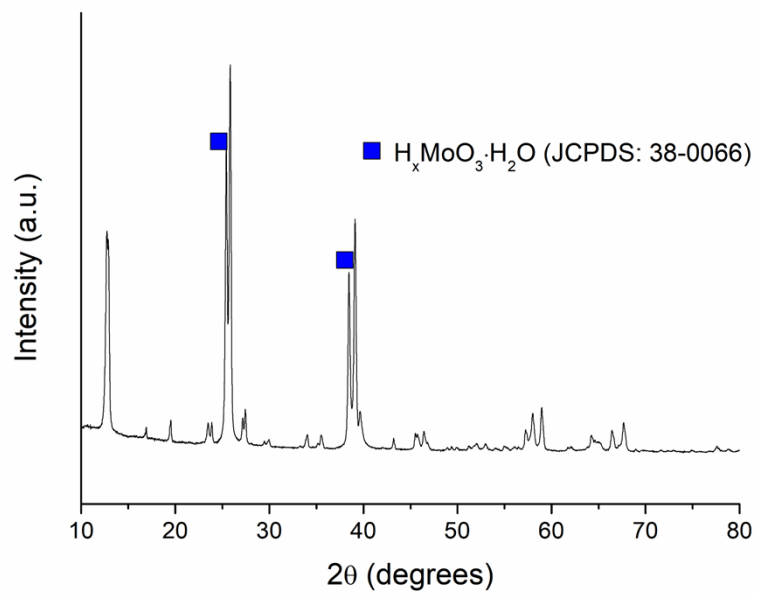

Figure S5 Powder XRD pattern of 1.86 wt.% Pd/MoO<sub>3</sub> sample after 72 h irradiation for methane oxidation reaction.

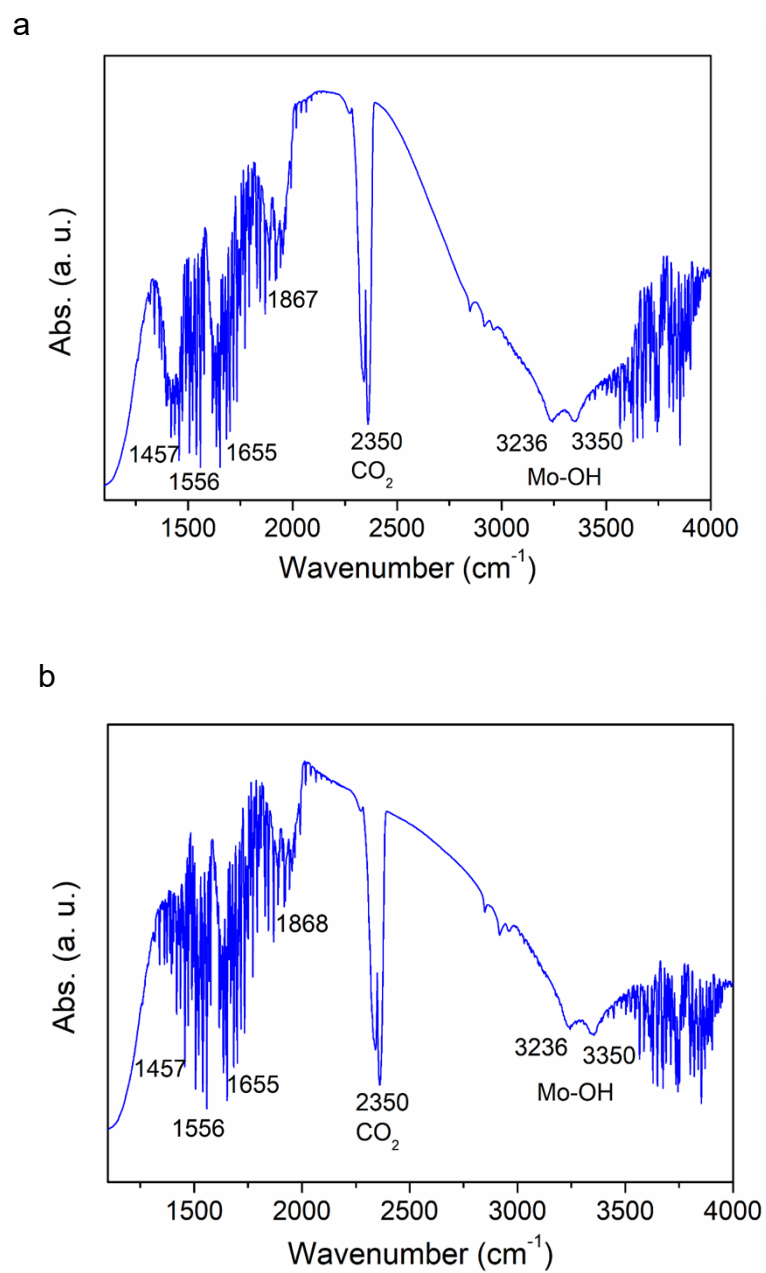

Figure S6 Background DRIFT spectrum of the pure  $\text{MoO}_3$  (a) and 1.86 wt.%  $\text{Pd}/\text{MoO}_3$  (b) samples.

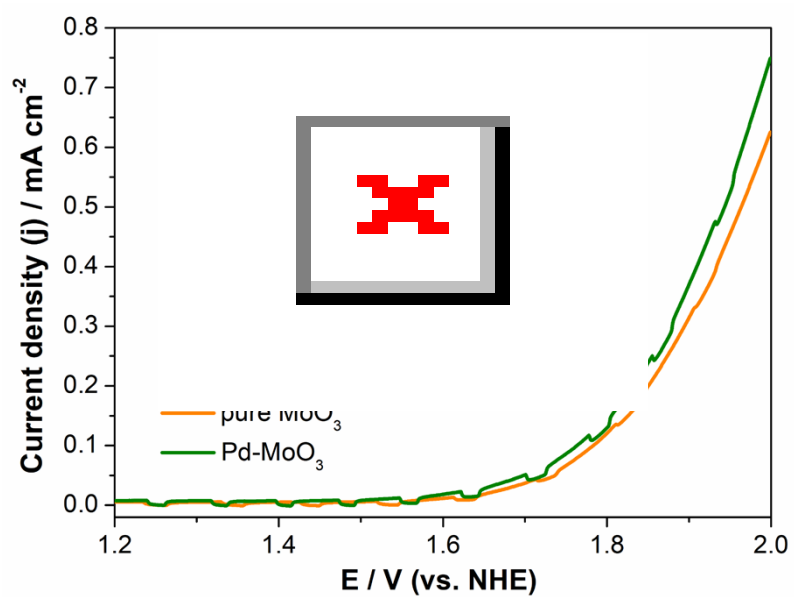

Figure S7 Anodic current-potential scans and corresponding Tafel plots of the as-prepared MoO<sub>3</sub> and 1.86 wt.% Pd/MoO<sub>3</sub> samples in 0.1 M Na<sub>2</sub>SO<sub>4</sub> under 300 W chopped Xe arc lamp irradiation.
